# Supplementary material
Source: MDPI journal article supplement (https://www.mdpi.com/2504-3129/3/4/41)
Supplement: s1 [file s1]

## Supplemental Material

**Table S1:** Experimental measures/applications during the pot experiment.

| Date (DOY*) | Experimental measures/applications                                                         |
|-------------|--------------------------------------------------------------------------------------------|
| 80          | Seeding of cvs. Taifun, Monsun, Golia, Gönen                                               |
| 101         | Reduction to 10 plants per Mitscherlich pot                                                |
| 102         | Water supply to field capacity; installation of TDR-probes                                 |
| 103         | 1. N fertilization (N1) 90 kg ha <sup>-1</sup> (EC 10); 4 cultivars                        |
| 130         | Fungicide treatment to Golia and Gönen with 'AGENT'                                        |
| 131         | 2. N fertilization (N2) 45 kg ha <sup>-1</sup> (EC 30); 4 cultivars                        |
| 141         | Reduction to 8 plants per Mitscherlich pot                                                 |
| 141         | 3. N fertilization (N3) cv. Taifun, 30 or 60 kg ha <sup>-1</sup> (EC 51)                   |
| 143         | 3. N fertilization (N3) cv. Monsun, 30 or 60 kg ha <sup>-1</sup> (EC 51)                   |
| 146         | cv. Taifun: Start of differentiated water supply; well-watered, water deficit (EC 59)      |
| 147         | cv. Monsun: Start of differentiated water supply; well-watered, water deficit (EC 59)      |
| 147         | 3. N fertilization (N3) cv. Golia, 30 or 60 kg ha <sup>-1</sup> (EC 51)                    |
| 150         | cv. Golia: Start of differentiated water supply; well-watered, water deficit (EC 59)       |
| 153         | 3. N fertilization (N3) cv. Gönen, 30 or 60 kg ha <sup>-1</sup> (EC 51)                    |
| 155         | cv. Gönen: Start of differentiated water supply; well-watered, water deficit (EC 59)       |
| 168         | cv. Taifun: Resaturation of water deficit plants to field capacity and end of water supply |
| 169         | cv. Monsun: Resaturation of water deficit plants to field capacity and end of water supply |
| 172         | cv. Golia: Resaturation of water deficit plants to field capacity and end of water supply  |
| 177         | cv. Gönen: Resaturation of water deficit plants to field capacity and end of water supply  |
| 199         | cv. Taifun: Maturity (EC 89), sampling                                                     |
| 200         | cv. Monsun: Maturity (EC 89), sampling                                                     |
| 205         | cv. Golia: Maturity (EC 89), sampling                                                      |
| 212         | cv. Gönen: Maturity (EC 89), sampling                                                      |

\* Day of year (DOY)
